# Supplementary material for: Functional Analysis of Sirtuin Genes in Multiple Plasmodium falciparum Strains
Source: PubMed Central journal article supplement (PMC4364008; doi:10.1371/journal.pone.0118865), 2015-03-17

S2 Fig. Merrick et al.

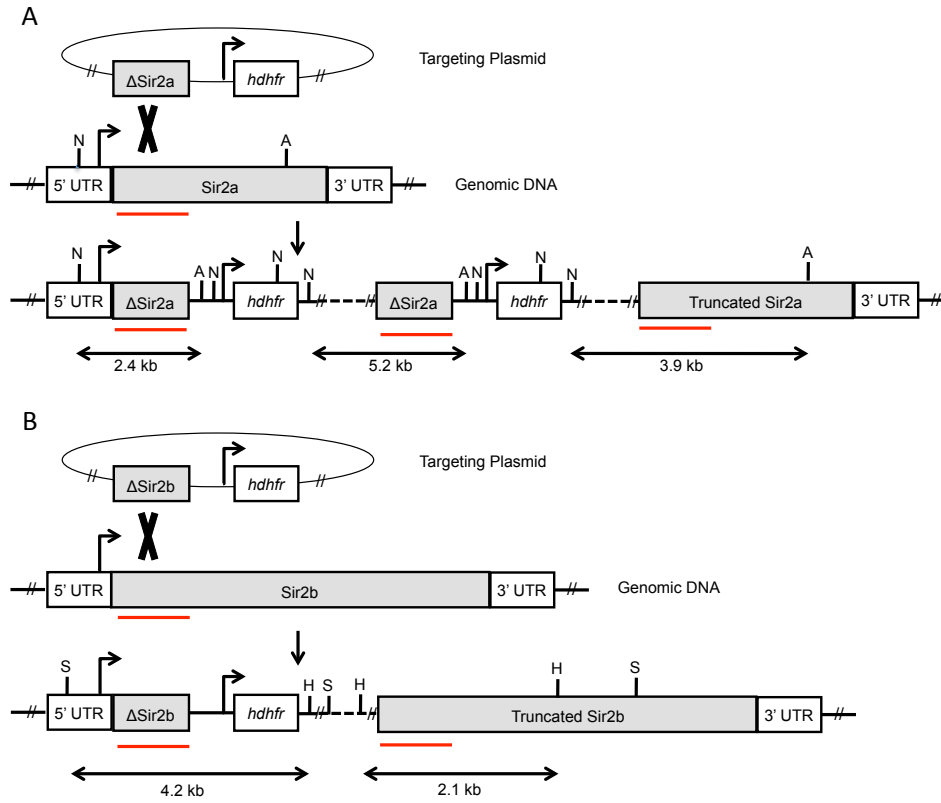

Supplement: pone.0118865.s002.pdf [file pone.0118865.s002.pdf]
