# Supplementary material for: Functional Analysis of Sirtuin Genes in Multiple Plasmodium falciparum Strains
Source: PubMed Central journal article supplement (PMC4364008; doi:10.1371/journal.pone.0118865), 2015-03-17
Supplement: pone.0118865.s009.pdf [file pone.0118865.s009.pdf]

**S5 Table – P. falciparum genes in the genomic region that showed copy number change in 3D7deltaSir2a (versus 3D7) on chromosome 10: Comparative Hybridization**

| Gene ID         | Genomic Location(s)                          | Organism          | Previous ID(s) | Product Description                                                         |
|-----------------|----------------------------------------------|-------------------|----------------|-----------------------------------------------------------------------------|
| PF3D7_1028700   | Pf3D7_10_v3:<br>1,181,005 -<br>1,182,501 (+) | P. falciparum 3D7 | PF10_0281      | merozoite TRAP-like protein (MTRAP)                                         |
| PF3D7_1028800   | Pf3D7_10_v3:<br>1,183,487 -<br>1,183,995 (-) | P. falciparum 3D7 | PF10_0282      | conserved Plasmodium protein, unknown function                              |
| PF3D7_1028900   | Pf3D7_10_v3:<br>1,184,728 -<br>1,185,946 (-) | P. falciparum 3D7 | PF10_0283      | conserved Plasmodium protein, unknown function                              |
| PF3D7_1029000   | Pf3D7_10_v3:<br>1,186,855 -<br>1,189,548 (-) | P. falciparum 3D7 | PF10_0283a     | conserved Plasmodium protein, unknown function, pseudogene                  |
| PF3D7_1029100.1 | Pf3D7_10_v3:<br>1,190,426 -<br>1,195,016 (+) | P. falciparum 3D7 | PF10_0284      | conserved Plasmodium protein, unknown function                              |
| PF3D7_1029100.2 | Pf3D7_10_v3:<br>1,190,426 -<br>1,195,016 (+) | P. falciparum 3D7 | null           | conserved Plasmodium protein, unknown function                              |
| PF3D7_1029200   | Pf3D7_10_v3:<br>1,195,677 -<br>1,197,344 (+) | P. falciparum 3D7 | PF10_0285      | conserved Plasmodium protein, unknown function                              |
| PF3D7_1029300   | Pf3D7_10_v3:<br>1,197,825 -<br>1,200,032 (-) | P. falciparum 3D7 | PF10_0286      | conserved Plasmodium protein, unknown function                              |
| PF3D7_1029400   | Pf3D7_10_v3:<br>1,200,894 -<br>1,202,399 (-) | P. falciparum 3D7 | PF10_0287      | conserved Plasmodium protein, unknown function                              |
| PF3D7_1029500   | Pf3D7_10_v3:<br>1,204,346 -<br>1,204,762 (-) | P. falciparum 3D7 | PF10_0288      | conserved Plasmodium protein, unknown function                              |
| PF3D7_1029600   | Pf3D7_10_v3:<br>1,206,302 -<br>1,207,405 (+) | P. falciparum 3D7 | PF10_0289      | adenosine deaminase, putative                                               |
| PF3D7_1029700   | Pf3D7_10_v3:<br>1,208,198 -<br>1,210,914 (-) | P. falciparum 3D7 | PF10_0290      | conserved Plasmodium protein, unknown function                              |
| PF3D7_1029800   | Pf3D7_10_v3:<br>1,211,658 -<br>1,212,971 (-) | P. falciparum 3D7 | PF10_0291      | RAP protein, putative                                                       |
| PF3D7_1029900   | Pf3D7_10_v3:<br>1,217,348 -<br>1,222,441 (+) | P. falciparum 3D7 | PF10_0292      | conserved Plasmodium protein, unknown function                              |
| PF3D7_1030000   | Pf3D7_10_v3:<br>1,223,375 -<br>1,224,167 (+) | P. falciparum 3D7 | PF10_0293      | transcription factor, putative                                              |
| PF3D7_1030100   | Pf3D7_10_v3:<br>1,224,519 -<br>1,229,092 (-) | P. falciparum 3D7 | PF10_0294      | pre-mRNA-splicing factor ATP-dependent RNA helicase PRP22, putative (PRP22) |
| PF3D7_1030200   | Pf3D7_10_v3:<br>1,230,561 -<br>1,231,913 (-) | P. falciparum 3D7 | PF10_0295      | conserved Plasmodium protein, unknown function                              |
| PF3D7_1030300   | Pf3D7_10_v3:<br>1,233,667 -<br>1,237,002 (-) | P. falciparum 3D7 | PF10_0296      | conserved Plasmodium protein, unknown function                              |
