# Supplementary material for: Functional Analysis of Sirtuin Genes in Multiple Plasmodium falciparum Strains
Source: PubMed Central journal article supplement (PMC4364008; doi:10.1371/journal.pone.0118865), 2015-03-17
Supplement: pone.0118865.s010.pdf [file pone.0118865.s010.pdf]

**S6 Table – CNVs in NF54 (versus 3D7): Comparative Genomic Hybridization**

| Chromosome | Event     |           | Event size (bps) | Number of probes in event | Average Log2Ratio of event | Loss/Gain | Subtelomeric/Non-subtelomeric | Gene ID                       | Gene product categories                                                                                                                                                                                               |
|------------|-----------|-----------|------------------|---------------------------|----------------------------|-----------|-------------------------------|-------------------------------|-----------------------------------------------------------------------------------------------------------------------------------------------------------------------------------------------------------------------|
|            | Start     | End       |                  |                           |                            |           |                               |                               |                                                                                                                                                                                                                       |
| 2          | 1,757     | 69,077    | 67,320           | 796                       | 0.86                       | Gain      | Telomeric/Telomeric           | PF3D7_0200100 - PF3D7_0201400 | erythrocyte membrane protein 1, PfEMP1, rifin, erythrocyte membrane protein 1 (PfEMP1) - exon2, stevor, erythrocyte membrane protein 1 (PfEMP1) - truncated, stevor - pseudogene, Plasmodium exported protein (hyp10) |
| 2          | 69,081    | 90,945    | 21,864           | 404                       | 2.57                       | Gain      | Subtelomeric                  | PF3D7_0201400 - PF3D7_0201800 | Plasmodium exported protein (hyp10), Plasmodium exported protein (hyp9), Plasmodium exported protein (PHISTb), DnaJ protein (putative), RESA-like protein with PHIST and DnaJ domains                                 |
| 2          | 90,993    | 98,489    | 7,496            | 86                        | 4.56                       | Gain      | Subtelomeric                  | PF3D7_0201900                 | erythrocyte membrane protein 3                                                                                                                                                                                        |
| 2          | 98,653    | 113,237   | 14,584           | 217                       | 2.61                       | Gain      | Subtelomeric                  | PF3D7_0201900 - PF3D7_0202200 | erythrocyte membrane protein 3, knob-associated histidine-rich protein, Plasmodium exported protein (PHISTc), Plasmodium exported protein,                                                                            |
| 3          | 58,777    | 70,557    | 11,780           | 171                       | 1.70                       | Gain      | Subtelomeric                  | PF3D7_0300700 - PF3D7_0301000 | rifin, acyl-CoA synthetase                                                                                                                                                                                            |
| 3          | 70,561    | 86,529    | 15,968           | 268                       | 2.67                       | Gain      | Subtelomeric                  | PF3D7_0301100 - PF3D7_0301500 | Plasmodium exported protein (hyp13), serine/threonine protein kinase (FIKK family), alpha/beta hydrolase, Plasmodium exported protein                                                                                 |
| 6          | 1,363,702 | 1,366,445 | 2,743            | 58                        | -1.13                      | Loss      | Subtelomeric                  | PF3D7_0632500                 | erythrocyte membrane protein 1 (PfEMP1)                                                                                                                                                                               |
| 6          | 1,372,280 | 1,372,657 | 377              | 11                        | -1.81                      | Loss      | Subtelomeric                  | PF3D7_0632700                 | rifin                                                                                                                                                                                                                 |
| 6          | 1,376,435 | 1,378,888 | 2,453            | 39                        | -1.37                      | Loss      | Subtelomeric                  | PF3D7_0632800                 | erythrocyte membrane protein 1 (PfEMP1)                                                                                                                                                                               |
| 13         | 2,859,445 | 2,862,025 | 2,580            | 49                        | 1.37                       | Gain      | Subtelomeric                  | PF3D7_1373500                 | erythrocyte membrane protein 1 (PfEMP1)                                                                                                                                                                               |
