# Supplementary material for: Functional Analysis of Sirtuin Genes in Multiple Plasmodium falciparum Strains
Source: PubMed Central journal article supplement (PMC4364008; doi:10.1371/journal.pone.0118865), 2015-03-17
Supplement: pone.0118865.s011.pdf [file pone.0118865.s011.pdf]

**S7 Table – Primers used in this study**

**Primers were obtained from Integrated DNA Technologies**

| <b>Primer name</b>      | <b>Forward primer</b>        | <b>Reverse primer</b>         |
|-------------------------|------------------------------|-------------------------------|
| <b>Cloning</b>          |                              |                               |
| Sir2a                   | gatccctaggatgggtaatttaatgatt | gatccttaagctacattatcttattttt  |
| Sir2pro                 | atgggcccaactaataacgatag      | gatccctaggaatatataattatcttaac |
| <b>Quantitative PCR</b> |                              |                               |
| Myosin                  | ggttcagaggatgggcaacat        | agacctgcgccagaaaacta          |
| Sir2a                   | gggaatgtattgaagcagt          | cgatgtgccaattactaaaa          |
| Sir2b                   | gtcccgctagctcttatcc          | Aattggcacctaacgattg           |
