# Supplementary material for: Functional Analysis of Sirtuin Genes in Multiple Plasmodium falciparum Strains
Source: PubMed Central journal article supplement (PMC4364008; doi:10.1371/journal.pone.0118865), 2015-03-17
Supplement: pone.0118865.s012.pdf [file pone.0118865.s012.pdf]

**S8 Table – var gene nomenclature and correction factors for qRT-PCR primer efficiency**

| Old var gene nomenclature    | New var gene nomenclature                         | Correction Factor 3D7 | Correction Factor NF54 |
|------------------------------|---------------------------------------------------|-----------------------|------------------------|
| PF08_0141                    | PF3D7_0800200                                     | -0.09965              | 0.499041               |
| MAL6P1.1                     | PF3D7_0632800                                     | 0.2707                | 0.23467                |
| MAL6P1.252                   | PF3D7_0617400                                     | 0.06505               | 0.142741               |
| MAL6P1.316                   | PF3D7_0600200                                     | -0.01155              | 0.147893               |
| MAL6P1.4                     | PF3D7_0632500                                     | -0.05185              | -0.172                 |
| MAL7P1.50                    | PF3D7_0712300                                     | -0.37325              | -0.09057               |
| MAL7P1.55                    | PF3D7_0712800                                     | 0.14465               | 0.325936               |
| MAL7P1.56                    | PF3D7_0712900                                     | -0.06595              | 0.243994               |
| PF07_0048                    | PF3D7_0711700                                     | -0.147                | -0.30061               |
| PF07_0049                    | PF3D7_0712000                                     | -0.04395              | 0.110853               |
| PF07_0050                    | PF3D7_0712400                                     | 0.0712                | 0.226181               |
| PF07_0051                    | PF3D7_0712600                                     | -0.0405               | 0.15666                |
| PF07_0139                    | PF3D7_0733000                                     | 0.1896                | 0.576498               |
| PF08_0103                    | PF3D7_0809100                                     | 0.2359                | 0.295264               |
| PF08_0106                    | PF3D7_0808700                                     | 0.0387                | 0.794433               |
| PF08_0140                    | PF3D7_0800300                                     | 0.2228                | 0.595811               |
| PF08_0142                    | PF3D7_0800100                                     | -0.0244               | 0.36938                |
| PF10_0001                    | PF3D7_1000100                                     | -0.0519               | 0.595811               |
| PF10_0406                    | PF3D7_1041300                                     | -0.06255              | 0.134763               |
| PF11_0007                    | PF3D7_1100100                                     | -0.12295              | -0.07899               |
| PF11_0008                    | PF3D7_1100200                                     | -0.21695              | -0.03289               |
| PF11_0521                    | PF3D7_1150400                                     | -0.2347               | -0.67903               |
| PF13_0001                    | PF3D7_1300100                                     | -0.0573               | 0.171632               |
| PF13_0003                    | PF3D7_1300300                                     | -0.87165              | -0.85301               |
| PF13_0364                    | PF3D7_1373500                                     | -2.0081               | 1.236447               |
| PFA0005w                     | PF3D7_0100100                                     | -0.67775              | -0.40355               |
| PFA0015c                     | PF3D7_0100300                                     | -1.4292               | -0.4266                |
| PFA0015c/PFI1820w/Mal6P1.314 | PF3D7_0100300/<br>PF3D7_0937600/<br>PF3D7_0600400 | 1.55575               | 2.162734               |
| PFA0765c                     | PF3D7_0115700                                     | -0.5661               | -1.91537               |
| PFB1055c                     | PF3D7_0223500                                     | -0.1358               | -0.02741               |
| PFC1120c/PFC0005w            | PF3D7_0324900/PF3D7_0300100                       | -0.0349               | -0.02741               |
| PFD0005w                     | PF3D7_0400100                                     | -0.2711               | <b>-2.04335</b>        |
| PFD0020c                     | PF3D7_0400400                                     | 0.0756                | 0.308632               |
| PFD0615c                     | PF3D7_0412400                                     | 0.10955               | 0.240753               |
| PFD0625c                     | PF3D7_0412700                                     | 0.9238                | 0.807795               |
| PFD0630c/PFD0635c            | PF3D7_0412900/PF3D7_0413100                       | 1.04145               | 0.408632               |
| PFD0995c                     | PF3D7_0420700                                     | 0.03815               | 0.114557               |
| PFD1000c                     | PF3D7_0420900                                     | 3.4116                | 2.784209               |
| PFD1005c                     | PF3D7_0421100                                     | -0.1147               | 1.813794               |
| PFD1015c                     | PF3D7_0421300                                     | 0.88525               | 1.580245               |
| PFD1235w                     | PF3D7_0425800                                     | 0.28195               | 0.548978               |
| PFD1245c                     | PF3D7_0426000                                     | -0.0819               | 0.033889               |

|                   |                             |          |          |
|-------------------|-----------------------------|----------|----------|
| PFE0005w          | PF3D7_0500100               | -0.10855 | -0.03274 |
| PFE1640w          | PF3D7_0533100               | -0.03585 | -0.24163 |
| PFI0005w          | PF3D7_0900100               | -0.0225  | 0.002329 |
| PFI1820w          | PF3D7_0937600               | -0.30685 | 0.02691  |
| PFI1830c          | PF3D7_0937800               | -0.71115 | -0.72655 |
| PFL0005w          | PF3D7_1200100               | 0.0299   | 0.280334 |
| PFL0020w          | PF3D7_1200400               | 0.1116   | 0.423175 |
| PFL0030c          | PF3D7_1200600               | -0.35135 | -0.08584 |
| PFL0935c          | PF3D7_1219300               | 0.06835  | 0.118127 |
| PFL1950w          | PF3D7_1240300               | 0.0882   | 0.455534 |
| PFL1955w/PFL1970w | PF3D7_1240400/PF3D7_1240900 | 0.99795  | 1.629812 |
| PFL1960w          | PF3D7_1240600               | -0.08075 | -1.08739 |
| PFL2665c          | PF3D7_1255200               | -0.8997  | -0.22437 |
