# Supplementary material for: Functional Analysis of Sirtuin Genes in Multiple Plasmodium falciparum Strains
Source: PLOS journal article supplement (doi:10.1371/journal.pone.0118865), 2015-03-17
Supplement: S7 (10.1371/journal.pone.0118865.s007) [file journal.pone.0118865.s007]

**S3 Table – Statistical test results of *var* gene expression levels between individual strains**

A. Paired Wilcoxon tests were performed between the individual strain *var* gene expression levels of different FCR-3, FCR-3sir2a and FCR-3sir2b strains. No significant *var* gene expression differences between the strains were detected.

| Strains <sup>+</sup> | FCR3<br>.Cl.1 | FCR3.Cl.<br>2 | FCR3Sir2<br>aX | FCR3Sir2<br>aY | FCR3Sir2<br>b.Cl.1 | FCR3Sir2<br>b.Cl.2 |
|----------------------|---------------|---------------|----------------|----------------|--------------------|--------------------|
| FCR3.Cl.1            | -             |               |                |                |                    |                    |
| FCR3.Cl.2            | 1.00          | -             |                |                |                    |                    |
| FCR3Sir2a3           | 0.81          | 1.00          | -              |                |                    |                    |
| FCR3Sir2a15          | 0.84          | 0.81          | 0.75           | -              |                    |                    |
| FCR3Sir2b.Cl.1       | 0.88          | 0.75          | 1.00           | 0.75           | -                  |                    |
| FCR3Sir2b.Cl.2       | 1.00          | 0.88          | 0.88           | 0.88           | 1.00               | -                  |

B. Paired Wilcoxon tests were performed between the individual strain *var* gene expression levels of NF54 and NF54 sir2b strains. No significant *var* gene expression differences between strains were detected.

| Strains <sup>+</sup> | NF54.Cl.21 | NF54.Cl.23.cf.<br>5 | NF54.sir2b12 | NF54.sir2b2 |
|----------------------|------------|---------------------|--------------|-------------|
| NF54.Cl.21           | -          |                     |              |             |
| NF54.Cl.23           | 1          | -                   |              |             |
| NF54.sir2b12         | 0.5        | 0.75                | -            |             |
| NF54.sir2b2          | 1          | 1                   | 0.5          | -           |

C. Paired Wilcoxon tests were performed between the individual *var* gene expression levels of different strains. Significant reduction in *var* gene expression occurs between 3D7sir2acom and 3D7sir2a.

| Strains <sup>+</sup> | 3d7sir2acom_c2 | 3d7sir2acom_c8 | 3d7sir2_13 | 3d7sir2_10 |
|----------------------|----------------|----------------|------------|------------|
| 3d7sir2acom_c2       | -              |                |            |            |
| 3d7sir2acom_c8       | 0.742          | -              |            |            |
| 3d7sir2_13           | 0.008*         | 0.007*         | -          |            |
| 3d7sir2_10           | 0.008*         | 0.008*         | 0.773      | -          |

\* Significant ( $p < 0.01$ ) differences are shaded gray.
